# Supplementary material for: Ring1B and Suv39h1 delineate distinct chromatin states at bivalent genes during early mouse lineage commitment
Source: Oxford University Press journal article supplement (doi:10.1242/dev.048363), 2010-06-23
Supplement: dev048363tables1.pdf [file dev048363tables1.pdf]

**Table S1. Primers for the selective amplification of mouse genomic regions from ChIP and C-ChIP (C) by real-time quantitative PCR**

| Locus              | Forward sequence           | Reverse sequence          |
|--------------------|----------------------------|---------------------------|
| <i>Actin</i>       | ccccaacacacctagcaaat       | actgccccattcaatgtctc      |
| <i>Atoh1</i>       | ccctcactcaggtcgctg         | cgtgcgaggagccaatca        |
| <i>Cdx2 (C)</i>    | accaccttctgctgagaatgtac    | cctcaatcacagggtcaagact    |
| <i>Cdx2</i>        | accaccttctgctgagaatgtac    | cctcaatcacagggtcaagact    |
| <i>Fgfr2*</i>      | accaaagctggctaggaactgg     | ctagcagccgcaaagagacacc    |
| <i>Fgfr2</i>       | gcaaagtttgagtaggcaacgc     | ggatcgcagaacagctaggacat   |
| <i>Gata4 (C)</i>   | cccagctaaagctaaaggacaccaag | ccaagtttccctccctctc       |
| <i>Gata4</i>       | aagagcgcttgctgtctcta       | ttgatagcctcagatctacgg     |
| <i>H19</i>         | accccaggtggaaagagctc       | ccaaggactcctatcacctccc    |
| <i>Hand1</i>       | ggcctagcctacttccctgct      | cagcattcctgaacccgaact     |
| <i>Hoxa7</i>       | taacctgtccgccaagat         | gctggagcatcaaatcaggtct    |
| <i>Hprt</i>        | tttcttttgattggtactccac     | tgattcctcaagatttaggcc     |
| <i>Intergenic</i>  | aaggggctctgcttaaaa         | agagctccatggcaggtaga      |
| <i>Kdr</i>         | gtggcceaagcaccataaaac      | agcatgaagacaagaacccct     |
| <i>Mixl1</i>       | cacagatactctaggcaggagcagc  | cctgtcaccatcaaaggcgc      |
| <i>Pax3</i>        | ggcggatatagcaaggtttc       | cctgtccctctacatgagattcagc |
| <i>Pou5f1 (C)</i>  | ctgtaaggacaggccgagag       | caggaggccttcattttcaa      |
| <i>Sox1 (C)</i>    | cctctttggcaagtggttg        | aaaagaggcaaaagcacagc      |
| <i>Sox1</i>        | acaagaggaggcagcgaacc       | tcgcaggtggaagtttctcc      |
| <i>Sox7 (C)</i>    | cggatagcagaaaacccgacccc    | cccatggcttgggtcatctcgc    |
| <i>Sox7</i>        | tccacagtgccagtttagggaa     | cagtaaactgtgggcagccac     |
| <i>γ-satellite</i> | aatcaaatgtgccgaggaa        | cagttgtttgtggcctcctt      |

\*, this primer set was used in sequential ChIP experiments.
