# Supplementary material for: Ring1B and Suv39h1 delineate distinct chromatin states at bivalent genes during early mouse lineage commitment
Source: Oxford University Press journal article supplement (doi:10.1242/dev.048363), 2010-06-23
Supplement: dev048363tables2.pdf [file dev048363tables2.pdf]

**Table S2. Primers for the amplification of mouse transcripts by real-time quantitative PCR**

| Locus                     | Forward sequence             | Reverse sequence           |
|---------------------------|------------------------------|----------------------------|
| <i>Actin</i>              | cgaggcccagagcaagag           | cgccccagttggttaacaatgc     |
| <i>Atoh1</i>              | ggagaagcttctgtgcacgc         | gggacatcgactgcaatgg        |
| <i>Bmi1</i>               | ccagggttttcaaaaatga          | tgcaacttctcctcggtctt       |
| <i>Cbx6</i>               | cctcctcaccagtttctc           | cctcattcattgtgcctctg       |
| <i>Cbx7</i>               | tacgaggagaaggagagag          | gaagcagagcttctcattgc       |
| <i>Cbx8</i>               | gtgccagggttcgacatagt         | agaatccttggtccgtgttg       |
| <i>Cdx2</i>               | tcaactcgccacaacctccc         | tggtcagctgggattgct         |
| <i>Dnmt1</i>              | ggtctatgcttctgttactctg       | ctgaccgctcttattgaacc       |
| <i>Dnmt3a</i>             | cctggtggaatgactcgcagaagga    | gccgaattgtgtcttgggtgatgaca |
| <i>Dnmt3b</i>             | ttcagtgaccagctcagacacgaa     | tcagaaggctggagacctcccttt   |
| <i>Dnmt3l</i>             | gctctaagaccttgaaaccttg       | gtcggttcactttgacttcgta     |
| <i>Eed</i>                | gcaacagagtaacctatacga        | caactgctaatagagggtgg       |
| <i>Ehmt1</i>              | cagatggagaacaatgggtct        | ttgcttccccacttctgtgt       |
| <i>Eomes</i>              | cctggtgtgtttttgtgtg          | tttaatagaccgggcaact        |
| <i>Eset</i>               | gaggccggggagaggtgaa          | tagctggtcggcgaagccct       |
| <i>Ezh2</i>               | atggagtcaaaggatcacagcagtgaca | tcagcaccactccactccacatt    |
| <i>Fgf4</i>               | gctgtgtgagcattctcgaggt       | agggccatgaacataccggg       |
| <i>Fgfr2</i>              | gaggaatacttgatcaccacgc       | ctggtgctgtcctgtttggg       |
| <i>G9a</i>                | tcaccctgactgacaatgag         | agacagggaacaacagaacac      |
| <i>Gata3</i>              | agtcgaggcccaaggcacga         | gctgccgacagccttcgctt       |
| <i>Gata4</i>              | aacaccctgagcaggcctc          | tttctgggaaactggagcttg      |
| <i>Hand1</i>              | acgtgctggccaaaggatgca        | tggttagctccagcgccta        |
| <i>Hoxa7</i>              | agttcaggaccgcaggaa           | ttgatctggcgtcagtgag        |
| <i>Jarid1a</i>            | gaatgaacttgaggcaatgac        | cccatttagaccatttctctc      |
| <i>Jarid1c</i>            | aatgagctggagattgtggtg        | caaatggcgctgtgttacact      |
| <i>Jarid1d</i>            | tacgaacggctatttaccctc        | tggtgtaacagactgtctaaga     |
| <i>Jmjd1a</i>             | gagccacagtcggagacttc         | ttggccatcatatcaaa          |
| <i>Jmjd2a</i>             | ttctgtgaattctgcgctc          | tagctgtgcacgggtgaagac      |
| <i>Jmjd2b</i>             | catgtggaagaccagtttg          | aaggggatgccgtacttctt       |
| <i>Jmjd2c</i>             | cttcacacagtttcggctca         | gatgactggccttacgtggt       |
| <i>Jmjd3</i>              | agatgatcaagtctgcctc          | catttctactgttaacgaacag     |
| <i>Kdr</i>                | gatgtccaaggctcaggaagt        | agttcaggaccggcagaggaa      |
| <i>L19</i>                | tgatctgctgagcggagttg         | ggaaaagaaggtcgtgtgga       |
| <i>Lsd1</i>               | gatgatgtctgggaaacagg         | gggccaaggtagaatacagag      |
| <i>Mblr</i>               | gtcctagagtcagtgttctgt        | gatgatattctactgacaagctg    |
| <i>Mel18</i>              | tgtgagctccaggtccataa         | cgccgttctatttcatcttt       |
| <i>Mixl1</i>              | gacagacctgatccagac           | gcttcaaacctagcttcag        |
| <i>Mll1</i>               | gatgctggcgtttgctgt           | cctggcttctggcgaattca       |
| <i>Mll2</i>               | gagcctaaatctctcac            | gccttgacatgctggtgc         |
| <i>Mll3</i>               | tcagtcggattcaagggtcc         | accatcactggatggtgaga       |
| <i>Nanog</i>              | cttacaagggtctgctactga        | tctgcttctggcaaggacc        |
| <i>Pax3</i>               | gggaactggaggcatgttta         | gttttccgcccagcaatta        |
| <i>Pl1</i>                | gtattatggagcagttcagccaa      | ggtgtcaagcctactcctttg      |
| <i>Phc1</i>               | gcaaaagggtacaatgtgag         | gtttcctagatcacgtttctc      |
| <i>Phc2</i>               | gcaaaagggtataatgtggg         | tcatagctggagttatctgag      |
| <i>Pou5f1 (transgene)</i> | cacgagtggaagcaactca          | agatggtggtctggctggaac      |
| <i>Ring1A</i>             | cctgcttgaggaaaggag           | actgcttttctgacacct         |
| <i>Ring1B</i>             | ttgcgaggattgtattatca         | gcgcttcaactcatcacga        |
| <i>S17</i>                | atgactccacaccaacaagc         | gccaactgtaggtcagtgagc      |
| <i>Sox1</i>               | tgaacgccttcatggtgtggtc       | gcgcgccgggtactgttaat       |
| <i>Sox2</i>               | aaaaccaccaatcccatcca         | cgaagcgcctaactgaccac       |
| <i>Sox7</i>               | cacgcggcgaagccaagtga         | tggccacacatgaaggca         |
| <i>Suv39h1</i>            | tgtaacctagttgtgatcc          | attcgggtactctcatgtc        |
| <i>Suv39h2</i>            | atctacgaatgcaactcaagggtg     | ccacagccattgctagtcttaa     |
| <i>Suz12</i>              | cctttgagaaccaacacag          | cttgttctggaattgcatgag      |
| <i>Tpbpa</i>              | ggtcattttcgtactgtgaagt       | ttcctagtcacctatgctctg      |
| <i>Utx</i>                | tcagtatctccagaagtcct         | tagagcacacctattgaacac      |
| <i>Utf1</i>               | ccctctccgcttagcac            | cagacttctgctggaagaac       |
