# Supplementary material for: Ring1B and Suv39h1 delineate distinct chromatin states at bivalent genes during early mouse lineage commitment
Source: Oxford University Press journal article supplement (doi:10.1242/dev.048363), 2010-06-23
Supplement: dev048363tables3.pdf [file dev048363tables3.pdf]

**Table S3. Genes selected for candidate-based epigenetic analysis in ES and TS cells, their protein functions, in vivo gene inactivation phenotypes and key references**

| Symbol       | Protein encoded                                    | Lineage affiliation* | Gene inactivation phenotypes                                                                             | References            |
|--------------|----------------------------------------------------|----------------------|----------------------------------------------------------------------------------------------------------|-----------------------|
| <i>Atoh1</i> | High mobility group (HMG) box transcription factor | Ectoderm             | Viable; defects in ventral telencephalic development (epilepsy).                                         | Malas et al., 2003    |
| <i>Cdx2</i>  | Homeobox transcription factor                      | Extra-embryonic      | Defective blastocoel cavity formation; no implantation.                                                  | Strumpf et al., 2005  |
| <i>Fgfr2</i> | Tyrosine kinase receptor                           | Diverse              | Lethality at 10.5 d.p.c.; defect in chorioallantoic fusion and placenta trophoblast cell proliferation.  | Xu et al., 1998       |
| <i>Gata4</i> | Homeobox transcription factor                      | Mesoderm             | Developmental arrest at 9 d.p.c.; abnormal germ layer morphogenesis during gastrulation.                 | Narita et al., 1997   |
| <i>Hand1</i> | Basic helix-loop-helix transcription factor        | Extra-embryonic      | Lethality at 7.5 d.p.c.; defect in trophoblast giant cell differentiation.                               | Riley et al., 1998    |
| <i>Hoxa7</i> | Paired-like homeobox transcription factor          | Mesoderm             | Viable; no phenotype.                                                                                    | Chen et al., 1998     |
| <i>Kdr</i>   | Tyrosine kinase receptor                           | Mesoderm             | Lethality at 8.5-9.5 d.p.c.; defect in the development of haematopoietic and endothelial cells.          | Shalaby et al., 1995  |
| <i>Pax3</i>  | Paired domain transcription factor                 | Mesoderm             | Mid-gestational lethality; defects in myogenesis; neural tube closure and neural crest-derived lineages. | Mansouri et al., 2001 |
| <i>Mixl1</i> | Zinc-finger transcription factor                   | Endoderm             | Lethality at 9.5 d.p.c.; profound defects in ventral morphogenesis.                                      | Hart et al., 2002     |
| <i>Sox1</i>  | Basic helix-loop-helix transcription factor        | Ectoderm             | Born alive; but die a few minutes after birth; defective cerebellum.                                     | Ben-Arie et al., 1997 |
| <i>Sox7</i>  | High mobility group (HMG) box transcription factor | Endoderm             | No information available.                                                                                | N/A                   |

Gene symbols are stated as reported within Mouse Genome Informatics (Bult et al., 2008).

\*Lineage affiliation reflects tissues in which genes are predominantly expressed in accordance with UniGene cDNA libraries (Wheeler et al., 2003).

- Ben-Arie, N., Bellen, H. J., Armstrong, D. L., McCall, A. E., Gordadze, P. R., Guo, Q., Matzuk, M. M. and Zoghbi, H. Y.** (1997). Math1 is essential for genesis of cerebellar granule neurons. *Nature* **390**, 169-172.
- Bult, C. J., Eppig, J. T., Kadin, J. A., Richardson, J. E. and Blake, J. A.** (2008). The Mouse Genome Database (MGD): mouse biology and model systems. *Nucleic Acids Res.* **36**, D724-D728.
- Chen, F., Greer, J. and Capecchi, M. R.** (1998). Analysis of *Hoxa7/Hoxb7* mutants suggests periodicity in the generation of the different sets of vertebrae. *Mech. Dev.* **77**, 49-57.
- Hart, A. H., Hartley, L., Sourris, K., Stadler, E. S., Li, R., Stanley, E. G., Tam, P. P., Elefanty, A. G. and Robb, L.** (2002). *Mixl1* is required for axial mesendoderm morphogenesis and patterning in the murine embryo. *Development* **129**, 3597-3608.
- Malas, S., Postlethwaite, M., Ekonomou, A., Whalley, B., Nishiguchi, S., Wood, H., Meldrum, B., Constanti, A. and Episkopou, V.** (2003). *Sox1*-deficient mice suffer from epilepsy associated with abnormal ventral forebrain development and olfactory cortex hyperexcitability. *Neuroscience* **119**, 421-432.
- Mansouri, A., Pla, P., Larue, L. and Gruss, P.** (2001). *Pax3* acts cell autonomously in the neural tube and somites by controlling cell surface properties. *Development* **128**, 1995-2005.
- Narita, N., Bielinska, M. and Wilson, D. B.** (1997). Wild-type endoderm abrogates the ventral developmental defects associated with *GATA-4* deficiency in the mouse. *Dev. Biol.* **189**, 270-274.
- Riley, P., Anson-Cartwright, L. and Cross, J. C.** (1998). The *Hand1* bHLH transcription factor is essential for placentation and cardiac morphogenesis. *Nat. Genet.* **18**, 271-275.
- Shalaby, F., Rossant, J., Yamaguchi, T. P., Gertsenstein, M., Wu, X. F., Breitman, M. L. and Schuh, A. C.** (1995). Failure of blood-island formation and vasculogenesis in *Flk-1*-deficient mice. *Nature* **376**, 62-66.
- Strumpf, D., Mao, C. A., Yamanaka, Y., Ralston, A., Chawengsaksophak, K., Beck, F. and Rossant, J.** (2005). *Cdx2* is required for correct cell fate specification and differentiation of trophoderm in the mouse blastocyst. *Development* **132**, 2093-2102.
- Wheeler, D. L., Church, D. M., Federhen, S., Lash, A. E., Madden, T. L., Pontius, J. U., Schuler, G. D., Schriml, L. M., Sequeira, E., Tatusova, T. A. et al.** (2003). Database resources of the National Center for Biotechnology. *Nucleic Acids Res.* **31**, 28-33.
- Xu, X., Weinstein, M., Li, C., Naski, M., Cohen, R. I., Ornitz, D. M., Leder, P. and Deng, C.** (1998). Fibroblast growth factor receptor 2 (FGFR2)-mediated reciprocal regulation loop between *FGF8* and *FGF10* is essential for limb induction. *Development* **125**, 753-765.
